# Supplementary material
Source: HighWire-hosted journal article supplement (https://www.annfammed.org/highwire/filestream/8354/field_highwire_adjunct_files/0/Han_Supp_Table.pdf)
Supplement: Han_Supp_Table.pdf [file Han_Supp_Table.pdf]

**Online Supplementary Material**

Han PKJ, Kobrin S, Breen N, et al. National evidence on the use of shared decision making in prostate-specific antigen screening. *Ann Fam Med.* 2013;11(4):306-314.

<http://www.annfammed.org/content/11/4/306>

| <b>Factor</b>                                    | <b>Low Intensity vs No Screening OR (95% CI)<sup>a</sup></b> | <b>High Intensity vs No Screening OR (95% CI)<sup>a</sup></b> | <b>P Value<sup>b</sup></b> |
|--------------------------------------------------|--------------------------------------------------------------|---------------------------------------------------------------|----------------------------|
| Age, years                                       |                                                              |                                                               | < .001                     |
| 50-59                                            | 1.0                                                          | 1.0                                                           |                            |
| 60-69                                            | 1.92 (1.56-2.36)                                             | 4.12 (3.26-5.21)                                              |                            |
| 70-74                                            | 1.75 (1.21-2.53)                                             | 4.75 (3.27-6.89)                                              |                            |
| Education                                        |                                                              |                                                               | < .001                     |
| < High school graduate                           | 1.0                                                          | 1.0                                                           |                            |
| High school graduate                             | 1.51 (1.16-1.96)                                             | 2.01 (1.34-3.04)                                              |                            |
| Some college/technical school                    | 1.88 (1.42-2.49)                                             | 3.48 (2.46-4.91)                                              |                            |
| College graduate                                 | 2.98 (2.23-3.98)                                             | 6.37 (4.40-9.21)                                              |                            |
| Usual source of medical care                     |                                                              |                                                               | < .001                     |
| Yes                                              | 1.0                                                          | 1.0                                                           |                            |
| No                                               | 0.22 (0.15-0.32)                                             | 0.05 (0.02-0.10)                                              |                            |
| Doctor recommendation                            |                                                              |                                                               | < .001                     |
| Yes                                              | 65.53 (48.55-88.44)                                          | 198.02 (136.14-288.04)                                        |                            |
| No                                               | 1.0                                                          | 1.0                                                           |                            |
| Extent of shared decision making <sup>c</sup>    |                                                              |                                                               | < .001                     |
| No elements                                      | 1.0                                                          | 1.0                                                           |                            |
| Partial (disadvantages only)                     | 4.64 (2.34-9.22)                                             | 5.68 (2.96-10.89)                                             |                            |
| Partial (advantages only)                        | 8.87 (6.41-12.27)                                            | 13.80 (9.69-19.66)                                            |                            |
| Partial (advantages + disadvantages/uncertainty) | 12.16 (7.91-18.71)                                           | 13.49 (8.68-20.94)                                            |                            |
| All elements                                     | 8.52 (5.37-13.52)                                            | 9.81 (6.04-15.95)                                             |                            |

PSA = prostate-specific antigen.  
 Note: PSA screening intensity: no screening = no prior testing; low intensity = 1-3 tests in past 5 years; high intensity = 4-5 tests in past 5 years  
<sup>a</sup> From multivariable polytomous logistic regression model with PSA screening as the dependent variable (n = 3,209)  
<sup>b</sup> Wald  $\chi^2$  test for association.  
<sup>c</sup> No elements = no physician discussion of advantages, disadvantages, or uncertainty; partial (disadvantages only) = discussion of disadvantages only, disadvantages + uncertainty, or uncertainty only; partial (advantages only) = discussion of advantages only; partial (advantages + disadvantages/uncertainty) = discussion of advantages + disadvantages or advantages + uncertainty; all elements = discussion of advantages, disadvantages, and uncertainty.
